1 **ARTICLE**

2 **Methods**

3  
4 **Secondary evolve and re-sequencing: an experimental confirmation of**  
5 **putative selection targets without phenotyping**

6 Claire Burny<sup>1,2</sup>, Viola Nolte<sup>1</sup>, Pierre Nouhaud<sup>1,§</sup>, Marlies Dolezal<sup>1</sup>, Christian Schlötterer<sup>1,#</sup>

7  
8 1) Institut für Populationsgenetik, Vetmeduni Vienna, Vienna, Austria

9 2) Vienna Graduate school of Population Genetics, Vetmeduni Vienna, Vienna, Austria

10 §) Present address: Organismal and Evolutionary Biology Research Program, University of  
11 Helsinki, Helsinki, Finland

12 #) E-mail: christian.schloetterer@vetmeduni.ac.at

13  
14 **\*\*\*KEYWORDS**

15 experimental evolution, *Drosophila simulans*, repeatability of evolution, evolve and re-  
16 sequence

17  
18 **ABSTRACT**

19 Evolve and re-sequencing (E&R) studies investigate the genomic responses of adaptation  
20 during experimental evolution. Because replicate populations evolve in the same controlled  
21 environment, consistent responses to selection across replicates are frequently used to identify  
22 reliable candidate regions that underlie adaptation to a new environment. However, recent work  
23 demonstrated that selection signatures can be restricted to one or a few replicate(s) only. These  
24 selection signatures frequently have a weak statistical support, and given the difficulties of  
25 functional validation, additional evidence is needed before considering them as candidates for  
26 functional analysis. Here, we introduce an experimental procedure to validate candidate loci  
27 with weak or replicate-specific selection signature(s). Crossing an evolved population from a  
28 primary E&R experiment to the ancestral founder population reduces the frequency of  
29 candidate alleles that have reached a high frequency. We hypothesize that genuine selection  
30 targets will experience a repeatable frequency increase after the mixing with the ancestral  
31 founders if they are exposed to the same environment (secondary E&R experiment). Using this  
32 approach, we successfully validate two overlapping selection targets, which showed a mutually  
33 exclusive selection signature in a primary E&R experiment of *Drosophila simulans* adapting

34 to a novel temperature regime. We conclude that secondary E&R experiments provide a  
35 reliable confirmation of selection signatures that are either not replicated or show only a low  
36 statistical significance in a primary E&R experiment. Such experiments are particularly helpful  
37 to prioritize candidate loci for time-consuming functional follow-up investigations.

38

## 39 INTRODUCTION

40 Experimental evolution provides the opportunity to study evolutionary processes over time  
41 scales short enough to be followed experimentally (Garland and Rose 2009; Kawecki et al.  
42 2012). The combination of high-throughput sequencing with experimental evolution (Evolve  
43 and Re-sequence, E&R) has been widely used to identify adaptive alleles across multiple  
44 replicates starting from the same reservoir of standing variation in highly similar, well-  
45 controlled environments (Turner et al. 2011; Long et al. 2015; Schlötterer et al. 2015). E&R  
46 studies successfully characterized the genomic responses during adaptation to novel selective  
47 pressures usually on organisms with short generation times (e.g.: Turner and Miller 2012;  
48 Burke et al. 2014; Lenski 2017; Papkou et al. 2019; Remigi et al. 2019). Laboratory natural  
49 selection experiments using the E&R framework studied responses to thermal (Orozco-  
50 terWengel et al. 2012; Tobler et al. 2014; Michalak et al. 2019) or desiccation stress (Schou et  
51 al. 2014), starvation (Michalak et al. 2019) and salt- and cadmium- enriched environments  
52 (Huang et al, 2014). The advantage of E&R studies starting from natural variation is that  
53 adaptation is possible without de novo mutations (Teotónio et al. 2009). Hence, even organisms  
54 with moderate experimental population sizes, such as *Drosophila*, are able to adapt to novel  
55 conditions within experimentally feasible time scales. Furthermore, when the starting variation  
56 is sampled from a natural population, E&R studies provide direct information about the  
57 frequency of the selected alleles in the wild (Barghi et al. 2019).

58

59 Standard statistical tests applied to E&R data (e. g. Cochran Mantel Haenszel (CMH) test  
60 (Agresti, 2002; Spitzer et al, unpublished data) or Generalized Linear Modeling (Phillips et al.  
61 2018)) require parallel selection responses across replicates. Two different, not mutually  
62 exclusive, factors can severely compromise the detection of selection targets based on these  
63 approaches. Polygenic adaptation to a new trait optimum results in reduced genomic  
64 parallelism across replicates (Franssen et al. 2017; Barghi et al. 2019). Furthermore, selected  
65 alleles with low starting frequencies are not only less likely to reach a detectable selection  
66 signature, but genetic drift, i.e. chance, also results in lower repeatability across replicates  
67 (Lenormand et al. 2016). One further complication for the identification of selection targets

68 with low starting frequencies arises from hitchhiking of SNPs shared with haplotypes carrying  
69 the favorable allele (Nuzhdin and Turner 2013; Tobler et al. 2014; Franssen et al. 2015). In this  
70 case, the limited number of recombination events during the experiment results in large  
71 genomic regions with selection signatures when selection operates on low frequency alleles,  
72 that make the identification of individual candidate genes impossible.

73

74 The functional characterization of selected alleles in E&R studies is an important next step for  
75 a better understanding of adaptation processes, but despite the recent advances based on the  
76 CRISPR/Cas9 technology (Bassett et al. 2013), the functional characterization of different  
77 alleles in a standardized genetic background is still a challenging and time-consuming task.  
78 This implies that investigators are well-advised to have high confidence in alleles that are going  
79 to be functionally tested.

80

81 We propose a simple experimental procedure to validate candidate regions with weak statistical  
82 support, either due to a weak selection signature across replicates or replicate-specific selection  
83 signatures. The basic idea of this approach is that an evolved population is “diluted” with  
84 ancestral genotypes. This reduces the frequency of putatively selected alleles and the  
85 reproducible increase in frequency of selected alleles in multiple replicates evolving under the  
86 same selection regime (secondary E&R) serves as a validation of candidate regions. Because  
87 secondary E&R experiments provide the opportunity for additional recombination events, we  
88 also evaluated whether this approach increases the mapping resolution, which is particularly  
89 important for low frequency beneficial alleles.

90 Applying secondary E&R to a candidate region identified in *D. simulans* populations that have  
91 been exposed to a novel constant hot environment at 23°C for 70 generations, we demonstrate  
92 that candidate selection targets can be experimentally confirmed.

93

#### 94 NEW APPROACHES

95 Previously, experimental evolution studies exposed laboratory evolved populations to selection  
96 regimes in the opposite direction (reverse evolution) (Teotónio and Rose 2001; Porter and  
97 Crandall 2003; Teotónio et al. 2009). The secondary E&R design introduced here, also relies  
98 on already laboratory selected populations, but rather than changing the selection regime, the  
99 same selection regime is applied after manipulating the evolved population. Secondary E&R  
100 is designed to provide researchers additional confidence about selection targets by repeating a  
101 selection signature in replicate populations after adding genotypes from the founder population,

102 which reduces the frequency of selected alleles. The repeated, parallel frequency increase of  
103 candidate regions provides a reliable confirmation of selection targets that were either having  
104 a weak selection signal or were only detected in a single replicate.

105

## 106 RESULTS

### 107 **Discovery of candidate SNPs: primary E&R**

108 Three replicates of a *D. simulans* founder population were maintained in a constant hot  
109 environment (23°C) for 70 non-overlapping generations. Sequencing pools of 1,250  
110 individuals (Pool-Seq, Kofler and Schlötterer 2013; Schlötterer et al. 2014; Table SI 1) resulted  
111 in a catalogue of 2,560,538 polymorphic SNPs (see Methods, Table SI 2). We identified  
112 candidate SNPs by contrasting allele frequency changes (AFC) between ancestral and evolved  
113 populations with a CMH test after accounting for drift using a 1% empirical FDR threshold  
114 (see Methods). Since p-values obtained from contingency tables tests are affected by coverage,  
115 we also accounted for coverage heterogeneity among samples (56x – 261x, Table SI 3) by  
116 weighting p-values following the Iterative Hypothesis Weighting procedure (IHW, Ignatiadis  
117 et al. 2016) (see Methods). The genome-wide analysis identified a candidate region of 1.628Mb  
118 on chromosome arm 3R with a pronounced AFC between ancestral and evolved populations  
119 (Fig. 1., top left, the full genomic analysis will be published elsewhere).

120 The power of the CMH test relies on the experimental replicates to detect putative targets of  
121 selection. However, its power is limited when candidates are not shared across replicates.  
122 Analyzing this genomic region separately for each of the replicates using a Fisher's Exact Test  
123 (FET) indicated considerable heterogeneity among them: among the SNPs with the most  
124 significant CMH p-values across all three replicates, the top 20 SNPs in the FET of replicate x  
125 were only significant in replicate x (FET<sub>x</sub>, Fig. 1., bottom left, top center, top right, red), with  
126 16 SNPs being close to fixation. Removing replicate x from the CMH analysis and using only  
127 replicates y and z, we obtained a much weaker selection signature in the CMH test (CMH<sub>y,z</sub>,  
128 Fig. 1., bottom right). Only three of the 20 most significant SNPs of this analysis (CMH<sub>y,z</sub>)  
129 were overlapping with the most significant SNPs of the analysis including x (CMH<sub>x,y,z</sub>).  
130 Instead, the 20 most significant SNPs of CMH<sub>y,z</sub> changed in both replicates y and z with a mean  
131 AFC of 0.55. This AFC is less pronounced than the one observed for the significant SNPs of  
132 replicate x (0.96). This heterogeneity among replicates suggested that at least two distinct

133 classes of haplotypes were selected.

134 We further scrutinized the hypothesis of at least two distinct selected haplotypes and plotted  
135 the AFC of the two sets of top 20 SNPs in the candidate region on chromosome arm 3R (Fig.  
136 3.): 20 SNPs from FET<sub>x</sub> and 20 SNPs from the joint analysis of replicates y and z, i.e. CMH<sub>y,z</sub>.  
137 The two sets of candidate SNPs displayed group-specific AFC; one set showed a pronounced  
138 AFC in replicate x and the other one in replicate z, but almost no change in the other (Fig. 3.,  
139 Fig. SI 1.).

#### 140 **Validation of candidate SNPs: secondary E&R**

141 The primary E&R study provided two sets of candidate SNPs. One set of candidates increased  
142 strongly in replicate x only, while the other set of candidates increased weakly in the two  
143 replicates y and z. To demonstrate that both sets of SNPs are associated with a selection target,  
144 we aimed to validate both selection signatures experimentally. Reasoning that fewer replicates  
145 are needed to confirm strong selection, only two diluted replicates were generated from evolved  
146 replicate x (x.1 and x.2), while three diluted replicates were generated from evolved replicate  
147 z (z.1, z.2 and z.3) which showed the weakest response in the initial E&R experiment. For both  
148 secondary E&R experiments we added flies from a reconstituted founder population (Nouhaud  
149 et al. 2016) aiming for a starting frequency around 0.5 for the most prominent candidate SNPs  
150 (see Fig. SI 2). This starting frequency of the candidate SNPs in the secondary E&R ensures a  
151 deterministic selection response and still provides sufficient opportunity for frequency  
152 increase.

153

154 After 30 generations of evolution at the same culture conditions, we sequenced the founders  
155 (D0) and evolved replicates (D30) of the secondary E&R experiments (see Fig. 2. for an  
156 overview). We contrasted the dynamics of the two groups of top candidate SNPs in each of the  
157 replicates in the primary and secondary E&R experiments over four time points (F0, F70, D0,  
158 D30). A very pronounced frequency increase can be noted in both the primary and secondary  
159 E&R experiments in the focal replicate from which the candidates were obtained (Fig. 3., Fig.  
160 SI 3). From an average starting allele frequency of 0.52 and 0.31 the candidate SNPs reach a  
161 mean final frequency of 0.98 (x) and 0.73 (z) in the replicates of the secondary E&R. The  
162 consistent AFC in the primary and secondary E&R experiments confirms a high repeatability  
163 of selection. Also, the candidate SNPs from the non-focal replicate consistently failed to show  
164 selection signatures (Fig. 3., Fig. SI 3). The only exception are 4 SNPs from the candidate set

165 of replicate z, which also increased in frequency in the primary and secondary E&R of replicate  
166 x (Fig. 3., Fig. SI 3, Fi. SI 6). Because the AFC was less pronounced than the one of the focal  
167 candidate SNPs of replicate x, we conclude that these SNPs may be shared between the two  
168 alternatively selected haplotype classes.

169

170 For a more complete picture we expanded our analysis of the 20 most significant SNPs to all  
171 significant SNPs ( $FDR < 0.01$ ) of the primary E&R. We jointly plotted the distribution of  
172 selection coefficients obtained from the primary and secondary E&R experiments (see  
173 Methods). Consistent with the previous analyses, all candidate SNPs had a selection coefficient  
174 larger than zero in their focal replicate - independently of whether primary or secondary E&R  
175 experiments were analyzed (Fig. 4.a., Fig. SI 4). The inferred selection coefficients for replicate  
176 x are about twice as high as the ones for replicate y. The mean selection coefficients from the  
177 20 candidate SNPs are 0.26 and 0.27 for diluted replicates from x (0.26 in the primary E&R)  
178 and 0.08, 0.09, 0.12 for diluted replicates from z (0.09 in the primary E&R). As expected the  
179 selection coefficients of the non-focal top 20 candidate SNPs were distributed around zero.

180

181 Finally, to evaluate the influence of genetic drift, we simulated the dynamics of the significant  
182 SNPs ( $FDR < 0.01$ ) in the primary E&R under neutrality and compared them to their observed  
183 dynamics (Fig. 4.b., Fig. SI 5 and Methods). Plotting the pairwise observed and simulated  
184 neutral AFC of the primary E&R against the AFC of the secondary E&R experiment, we find  
185 that the simulated data are clearly distinct from the experimental ones. The significant SNPs of  
186 the experimental data cluster together in the upper right quadrant and do not overlap with  
187 neutral simulations, showing that genetic drift cannot explain the concordant signatures of the  
188 significant SNPs. As expected the separation of neutral and selected SNPs was clearer for the  
189 replicate x, where selection was stronger (Fig. 4.a.).

190

### 191 **No increased mapping resolution for the selection target**

192 Given that the dilution reduced the frequency of the selection target, we anticipated that  
193 additional recombination events occurring during the repeated spread of the selection targets  
194 would also increase the mapping resolution. Nevertheless, we noted that the selection signature  
195 was broader in the secondary E&R experiment than in the primary one (Fig. SI 6). Hence,  
196 despite the highly repeatable selection signature of candidate SNPs, the secondary E&R  
197 experiment did not yield more confidence about the focal target of selection than the primary  
198 E&R experiment.

199 DISCUSSION

200 One of the undisputed advantages of experimental evolution is that the precise experimental  
201 conditions are known, which allows to impose the same selection pressure on different  
202 populations and time points in a replicated manner. Hence, unless strong epistatic interactions  
203 dominate, it should be possible to confirm selected variants by experimentally manipulating  
204 allele frequencies in the population in which a favorable variant spread.

205 In this report we introduce a simple manipulation of the evolved populations. By adding  
206 unevolved genotypes, we reduce the frequency of the selection target, which provides the  
207 opportunity to monitor a repeatable frequency increase of selected alleles in replicated  
208 populations. Our results demonstrate that this novel approach accurately recovers the selection  
209 signature of candidate SNPs. Despite the mapping resolution of the primary E&R experiment  
210 could not be improved, it is striking how consistent the selection coefficients of the top  
211 candidate SNPs were replicated in the secondary E&R experiments, in particular because no  
212 phenotypes were measured and the actual selective force is not yet characterized.

213

214 We propose that secondary E&R experiments with unevolved genotypes provide an attractive  
215 approach to experimentally validate selection signatures. This is particularly important for  
216 either non-replicated or small allele frequency changes - both signatures of polygenic  
217 adaptation. The power of secondary E&R experiments is well-illustrated in our proof of  
218 principle study, in which no single SNP passed the genome-wide significance threshold in this  
219 genomic region in the primary E&R experiment in replicate z. Only by combining two  
220 replicates, y and z, we identified significant candidates, which could be confirmed in the  
221 secondary E&R experiment. Thus, we demonstrated that even populations with weak selection  
222 signatures can be used to confirm the presence of selection, which could not be recognized  
223 before.

224 Secondary E&R experiments are not fast, the 30 generations of this experiment took about 14  
225 months, but the maintenance of replicate populations does not require many resources and  
226 provides therefore a very good approach to experimentally validate genomic regions  
227 experiencing selection. Mapping of causative variants could not be achieved in this pilot study  
228 and requires alternative approaches to do so. Nevertheless, the dynamics of selected genomic  
229 regions are highly informative of the underlying genetic architecture of beneficial mutations.  
230 Polygenic adaptation to a novel trait optimum displays characteristic dynamics (Franssen et al,  
231 2017), which are best detected in multiple replicates. We anticipate that the analysis of multiple  
232 replicates in secondary E&R experiments will provide an unprecedented opportunity to study

233 replicated dynamics of selection targets in order to understand the architecture of adaptation.  
234 It is also conceivable to use this experimental setup to study the dynamics of a given selected  
235 region in an alternative selection regime.

236

237 A particularly interesting pattern could be confirmed in this study: two different haplotype  
238 classes are carrying adaptive variants that increase fitness of the populations in a novel hot  
239 environment. It is particularly remarkable that the two groups of haplotypes seem to be  
240 mutually exclusive - we see either one or the other increasing in frequency in the primary E&R  
241 experiment. Also in the secondary E&R experiments we see no evidence of parallel selection  
242 of both haplotype classes, but their different starting frequencies in the secondary E&R  
243 considerably decrease the opportunity for a strong frequency increase of the haplotype with the  
244 lower starting frequency. The mapping resolution is not high enough to determine whether the  
245 same gene is carrying a beneficial mutation in both haplotype classes or different genes are  
246 selected. Thus, similar to many other E&R studies, a good strategy for fine mapping is needed  
247 to answer these questions.

248

## 249 MATERIALS AND METHODS

### 250 **The Primary E&R Experiment**

#### 251 **Experimental Population and Selection Regime**

252 We collected a natural *D. simulans* population 10 km North of Stellenbosch, South Africa, in  
253 February and March 2013 and established isofemale lines that were maintained in the  
254 laboratory for approximately eight generations. For starting the primary E&R experiment, three  
255 mated females from each of 426 isofemale lines were combined three times to generate three  
256 replicates of the ancestral population (replicates x, y and z) in F0. They were subsequently  
257 maintained as independent populations with a census population size of 1,250 and non-  
258 overlapping generations under a constant 23°C temperature regime with a 12 hour light/12 hour  
259 dark cycle (LD 12:12) for 70 generations (F70). The 426 lines used for constituting the  
260 ancestral population were maintained as isofemale lines.

261

#### 262 **Creation of a Bona Fide SNP Catalogue for the Primary E&R study**

263 We generated Pool-Seq data for the 3 replicates of F0 from females only and for the 3 replicates  
264 in F70 (sex ratio ~ 50:50). DNA extraction, barcoded library preparation and sequencing  
265 followed standard procedures and are given in Supplementary Table I. We followed standard  
266 approaches for quality control, read mapping, read filtering, trimming as well as SNP calling



267 and SNP filtering.

268 We used libraries with different insert sizes, which can result in false positives (Kofler et al,  
269 2016). To account for this, we expanded the double-mapping procedure suggested by Kofler et  
270 al, 2016, and used three different mappers (NovoAlign (<http://novocraft.com>), Bowtie2  
271 (Langmead and Salzberg, 2012) and BWA-MEM (Li and Durbin, 2009)). We filtered for bi-  
272 allelic SNPs outside of repeat regions, and removed SNPs from positions outside the 99%  
273 quantile in terms of genome wide coverage. From this set of pre-filtered SNPs we keep only  
274 those for which the SNP frequency did not differ between all three mappers ( $p > 0.01$ , after FDR  
275 correction). We call this procedure triple-mapping. This resulted in a set of 2,560,538 high  
276 quality SNPs. Details are given in Supplementary Material I.

277

### 278 **Identifying Regions under Selection in the Primary E&R**

279 We performed Fisher's exact tests (FET) between the ancestral F0 and the evolved F70  
280 generation within each replicate and Cochran-Mantel-Haenszel tests (CMH) (Agresti, 2002)  
281 across replicates. As coverage variability (see Supplementary Table II) affects the power of  
282 FET and CMH tests, we used the independent hypothesis weighting (IHW) procedure  
283 (Ignatiadis et al, 2016) to weight the empirical p-values using the mean coverage at each SNP  
284 calculated from all replicates included in any particular test, as a covariate.

285 To determine the list of candidate SNPs, we ran neutral forward Wright-Fisher simulations for  
286 each replicate based on  $N_e$  estimates (Table 1) that we obtained for autosomes and the X  
287 chromosome using the poolSeq package (Taus et al, 2017). Neutral p-values were also  
288 submitted to the IHW procedure. Candidate SNPs were declared at a 1% FDR cut off, applying  
289 a conservative nonparametric empirical FDR estimator (Strimmer, 2008) using the weighted  
290 p-values from our simulations and the weighted p-values from our observed data. This was  
291 done separately for FET and CMH tests for each replicate.

292 Selection coefficients were determined for each SNP in each replicate on pseudo-count data  
293 (detailed in Supplementary Material I) using the poolSeq package assuming a dominance  
294 coefficient of 0.5.

295

### 296 **The Secondary E&R Experiment**

#### 297 **Experimental Population, Selection Regime and Sequencing**

298 Based on the primary E&R selection signature screen, we picked a candidate region on 3R  
299 (region details in Supplementary Figure 1) for further investigation. This region showed a very  
300 strong signal of positive selection in a CMH test across replicates x, y and z. We used evolved

301 flies from replicates x and z after 77 generations of evolution in the primary E&R experiment  
302 (F77) to set up a secondary E&R experiment in which the evolved flies were mixed with flies  
303 from a reconstituted ancestral population (Nouhaud et al, 2016, Supplementary Figure 2). We  
304 call this generation D0. Selection targets are expected to increase in frequency again in the  
305 secondary E&R experiment, which used the same culturing conditions as the primary E&R  
306 experiment.

307 Mixing proportions of ancestral and evolved populations to create D0 were chosen such that  
308 selected SNPs in our candidate region had allele frequencies of approximately 0.5 in D0: for  
309 replicate x, a 30:70 ratio between evolved and reconstituted ancestral flies, and for replicate z,  
310 a 50:50 ratio, respectively. We created two replicates for D0 for replicate x (x.1 and x.2), and  
311 three replicates for the diluted replicate z (z.1, z.2 and z.3). Replicates for D0 and D30 were  
312 subjected to Pool-Seq.

313

#### 314 **Validation of Signatures of Selection in the Secondary E&R**

315 Selection coefficients and neutrality tests were performed exactly as described for the primary  
316 E&R experiment.

317

#### 318 **ACKNOWLEDGMENTS**

319 We thank all members of the Institute of Population Genetics for feedback and support,  
320 especially Neda Barghi, Rui Borges, Lukas Endler, Andreas Futschik, Anna Maria Langmüller,  
321 Sonja Lečić, Kathrin Otte. Thomas Taus first proposed the secondary E&R. This work was  
322 supported by the Austrian Science Fund (FWF, grant W1225) and an European Research  
323 Council (ERC) grant (ArchAdapt).

324 Data availability. Raw Pool-Seq data will be uploaded to SRA XXX and available upon  
325 publication.

326

#### 327 **AUTHORS CONTRIBUTION**

328 V.N. performed experiments. P.N. did the first preliminary analysis of the primary E&R.  
329 C.B. analyzed the data. M.D. provided statistical support. C.B., C.S. wrote the paper.

330 FIGURES LEGENDS

331 **Figure 1** Replicate-specific selection signatures in the primary E&R study.

332 Manhattan plots of chromosome arm 3R displaying the negative log<sub>10</sub>-transformed weighted  
333 p-values of 680,937 SNPs for different statistical tests. A) CMH<sub>x,y,z</sub> (175/443), B) FET<sub>y</sub> (0/122),  
334 C) FET<sub>z</sub> (0/0), D) FET<sub>x</sub> (660/1,776) and E) CMH<sub>y,z</sub> (9/85). The number of candidates at 1%/5%  
335 empirical FDR thresholds for each test are given in parenthesis. The gray dotted line shows the  
336 1% (upper) and 5% (lower) empirical FDR thresholds of the corresponding test, computed over  
337 the autosomes from neutral simulations assuming no linkage. At the 1% empirical FDR  
338 threshold, CMH<sub>x,y,z</sub> and FET<sub>x</sub> identify a candidate peak region of 169 (9,042,023-  
339 10,670,451bp, 1.628Mbp) and 660 (9,000,008-10,384,933bp, 1.385Mbp) SNPs. The overlap  
340 between these two tests is 92 significant SNPs spanning 1.343Mb (see SI Fig. 1. for a close up  
341 of this genomic region). In all panels the top 20 SNPs from FET<sub>x</sub> and CMH<sub>y,z</sub> are highlighted  
342 in red and in blue.

343

344 **Figure 2** Schematic outline of the experimental design.

345 Three replicated populations of flies starting from the same founders evolved in parallel during  
346 70 generations (primary E&R, indicated in blue). The darkness of the flies symbolizes the level  
347 of adaptation to the new environment. For a given evolved replicate, the evolved flies are  
348 “diluted” with ancestral genotypes and independent replicates evolving for an additional 30  
349 generations under the identical environmental conditions as in the primary E&R (secondary  
350 E&R, indicated in black). The bottom panel indicates the allele frequency changes of candidate  
351 SNPs during the experiments. In the primary E&R the allele frequency increases (blue). By  
352 adding ancestral genotypes, the frequency of the candidate SNPs is decreased (black dotted  
353 lines). 30 generations of the secondary E&R result in a repeated frequency increase of the  
354 candidate SNPs, confirming non-neutral evolution.

355

356 **Figure 3** Allele frequency changes of the 20 most significant SNPs from FET<sub>x</sub> (red) and  
357 CMH<sub>y,z</sub> (blue) for the primary E&R (generation F0-F70) and secondary E&R (D0-D30).

358 The left panel shows experiment x and the right panel experiment z. Only first replicate the  
359 secondary E&R is shown for each experiment, for the other replicates, see supplement.

360

361 **Figure 4** Repeatability of selection signatures in primary and secondary E&R.

362 A) Selection coefficients are very similar. Symmetrical violin plots of the selection coefficients  
363 from primary E&R (dark gray) and the first replicate of the secondary E&R experiment (light

364 gray) for candidates in the region of interest. Black segments represent the median per sample.  
365 Ticks indicate SNPs. Left: experiment x. Right: experiment z. The 20 most significant SNPs  
366 from  $FET_x$  (red) and  $CMH_{y,z}$  (blue) are shown in color. B) Parallel changes in allele  
367 frequencies. Observed allele frequency changes for candidate SNPs (empirical FDR <1%) in  
368 replicate x (left) are shown in gray. For comparison, the expected neutral allele frequency  
369 changes based on the same starting frequency and coverage and a single simulation run are  
370 shown in orange. The 20 most significant SNPs from  $FET_x$  and  $CMH_{y,z}$  are shown in red and  
371 blue. Since, for replicate z no SNP exceeded the empirical FDR of 1% in the primary E&R,  
372 only the top 20 SNPs are shown (right panel). Ellipses around the empirical focal SNPs indicate  
373 the 99% probability range to visualize the bivariate densities.

374 TABLE

375 **Table 1** Autosomal  $N_e$  estimates of the primary and secondary E&R experiments.

|                          | <b>Replicate x</b> | <b>Replicate y</b> | <b>Replicate z</b> |
|--------------------------|--------------------|--------------------|--------------------|
| <b>Primary E&amp;R</b>   | 206                | 263                | 226                |
| <b>Secondary E&amp;R</b> | 134, 144           | -                  | 216, 193, 167      |

376

377 FIGURES

378

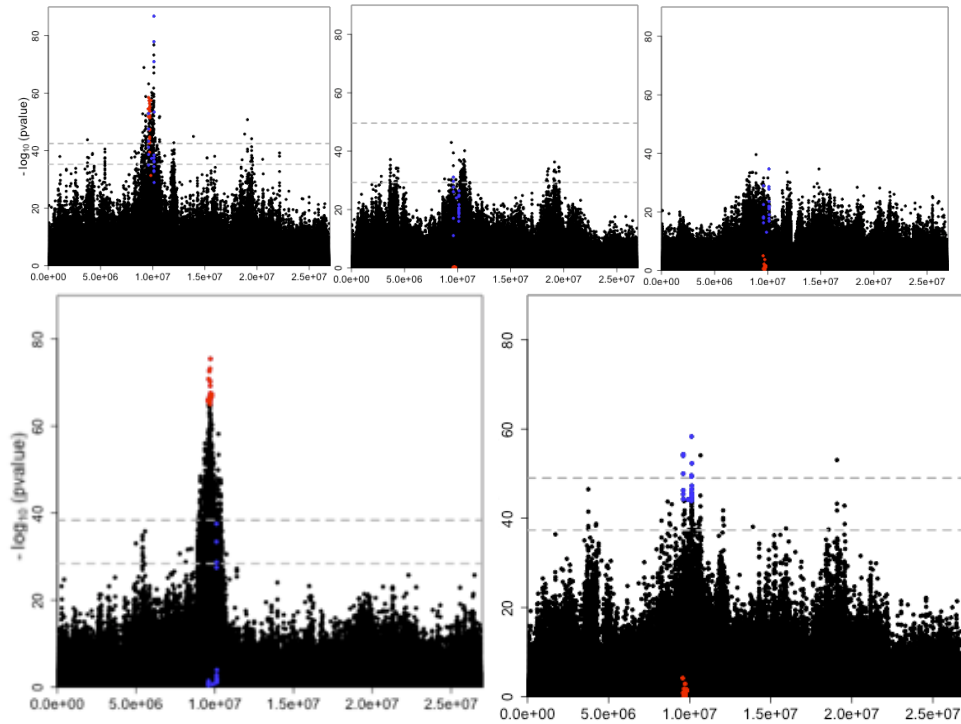

379

380

381

**Figure 1** Replicate-specific selection signatures in the primary E&R study.

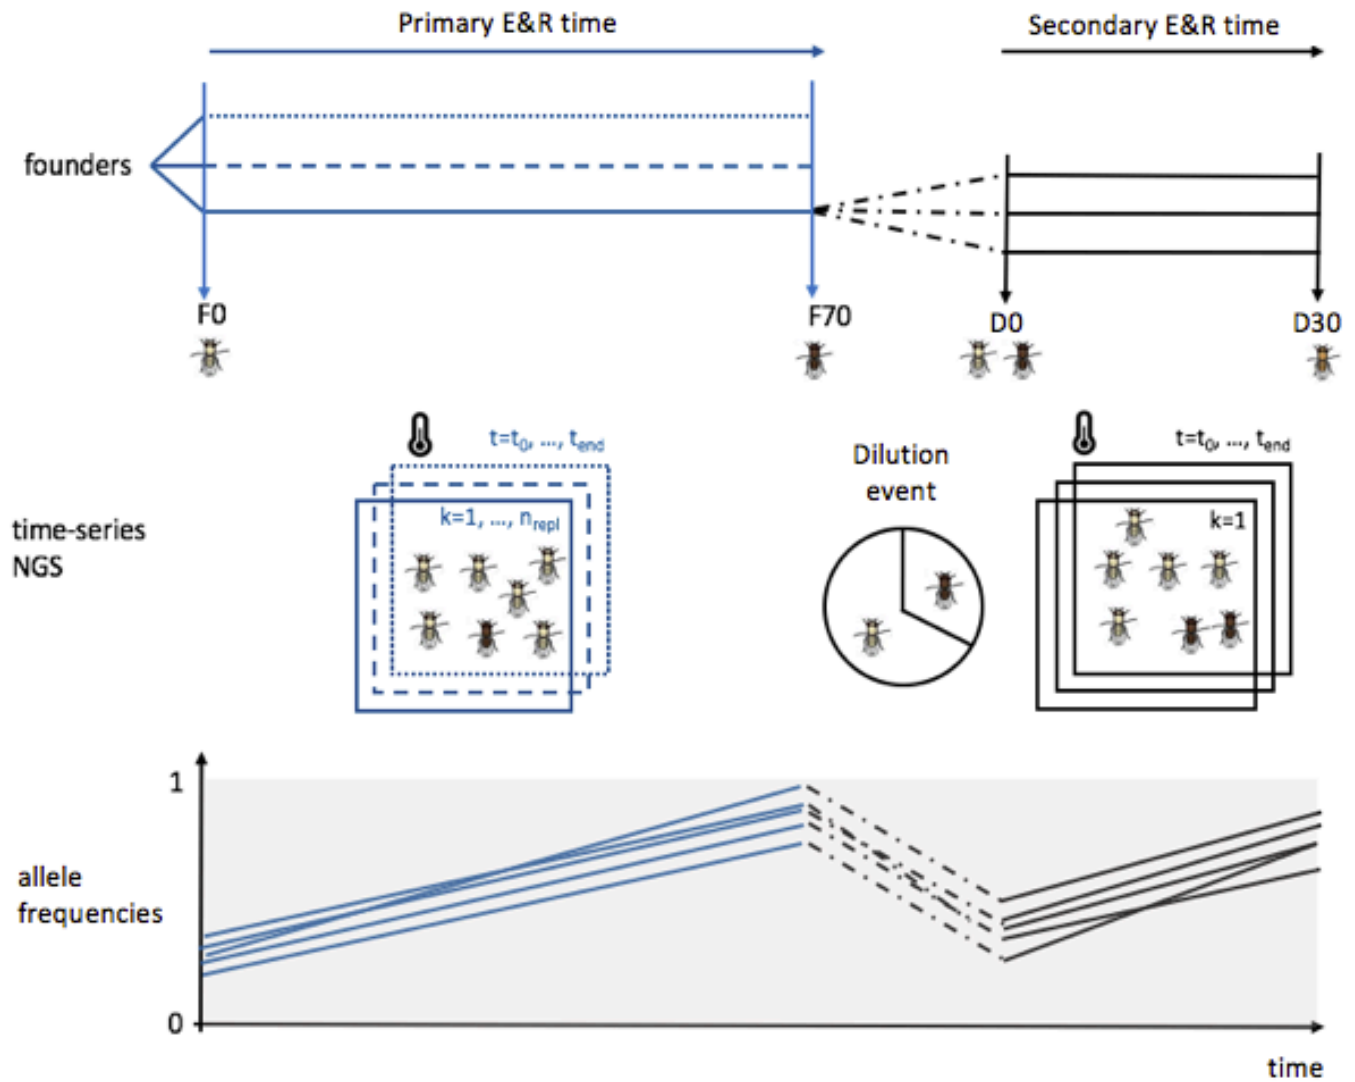

382

383 **Figure 2** Schematic outline of the experimental design.

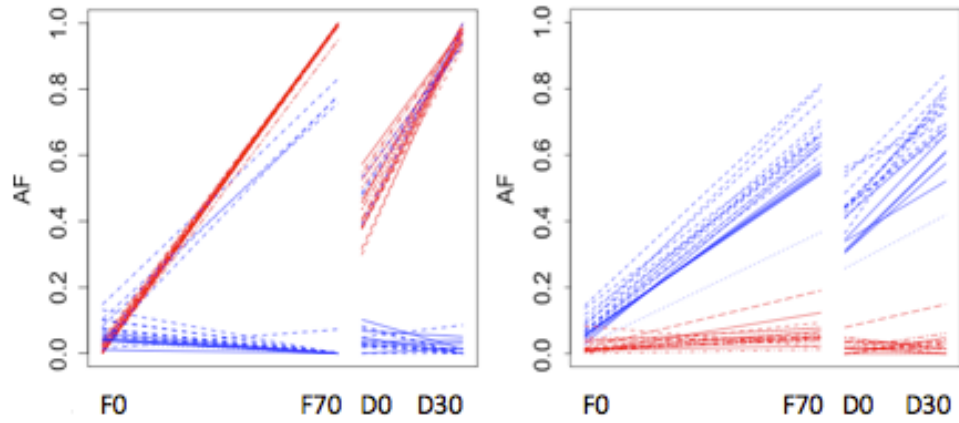

384

385 **Figure 3** Allele frequency changes of the 20 most significant SNPs from FET<sub>x</sub> (red) and  
386 CMH<sub>y,z</sub> (blue) for the primary E&R (generation F0-F70) and secondary E&R (D0-D30).



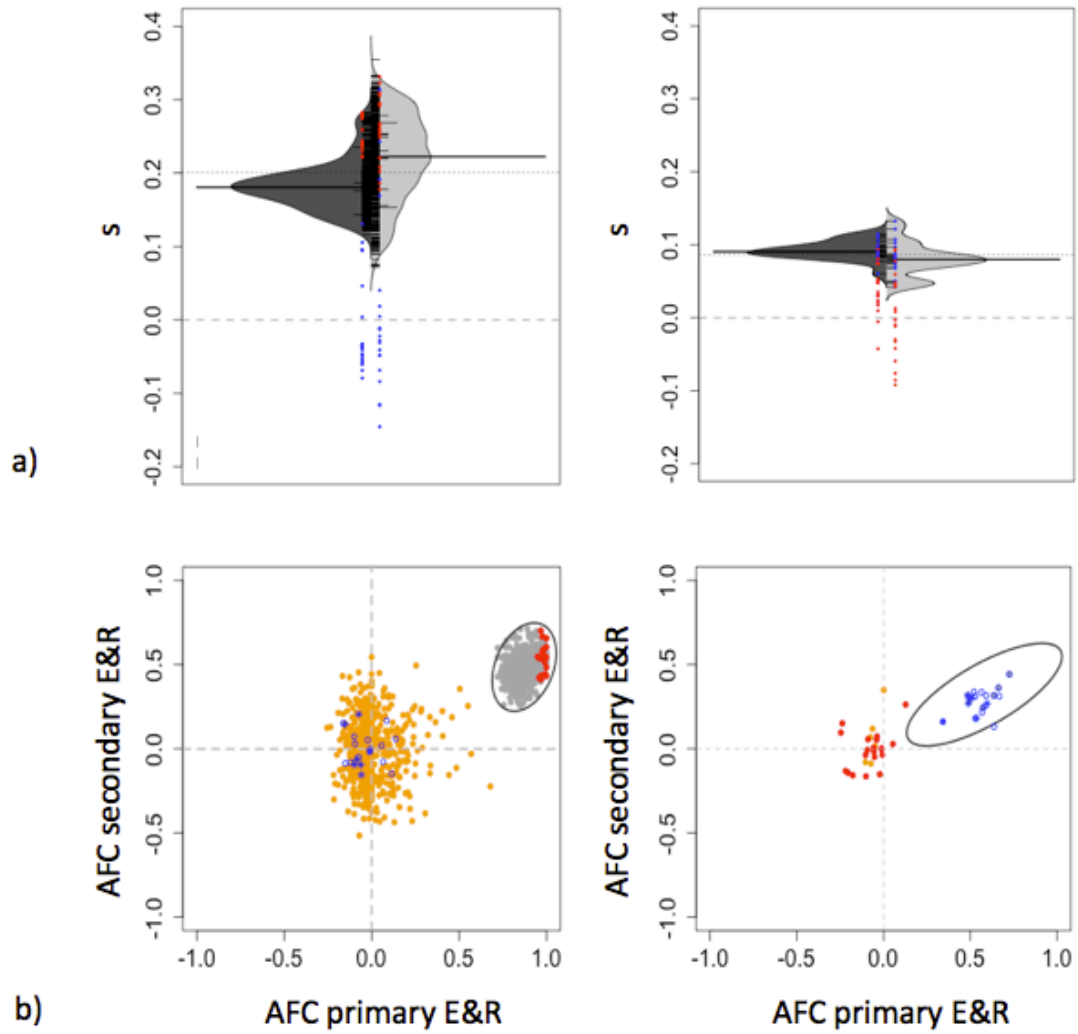

387

388 **Figure 4** Repeatability of selection signatures in primary and secondary E&R.

389 REFERENCES

- 390 Agresti A. 2002. *Categorical Data Analysis*. John Wiley & Sons, 2nd Edition.
- 391 Barghi N, Tobler R, Nolte V, Jakšić AM, Mallard F, Otte KA, Dolezal M, Taus T, Kofler R,  
392 Schlötterer C. 2019. Genetic redundancy fuels polygenic adaptation in *Drosophila*. *PLoS Biol*  
393 17(2):e3000128.
- 394 Bassett A, Tibbit C, Ponting CP, Liu J. 2013. Highly efficient targeted mutagenesis of  
395 *Drosophila* with the CRISPR/Cas9 system. *Cell Rep* 4(1):220-228.
- 396 Blount ZD, Lenski RE, Losos JB. 2018. Contingency and determinism in evolution: Replaying  
397 life's tape. *Science* 362(6415):eaam5979.
- 398 Burke MK, Liti G, Long AD. 2014. Standing genetic variation drives repeatable experimental  
399 evolution in outcrossing populations of *Saccharomyces cerevisiae*. *Mol Biol Evol* 31(12): 3228-  
400 3239.
- 401 Fragata I, Simões P, Lopes-Cunha M, Lima M, Kellen B, Bárbaro M, Santos J, Rose MR,  
402 Santos M, Matos M. 2014. Laboratory selection quickly erases historical differentiation. *PLoS*  
403 *One* 9(5):e96227.
- 404 Franssen S, Kofler R, Schlötterer C. 2017. Uncovering the genetic signature of quantitative  
405 trait evolution with replicated time series data. *Heredity* 118(1):42.
- 406 Franssen S, Nolte V, Tobler R, Schlötterer C. 2015. Patterns of linkage disequilibrium and long  
407 range hitchhiking in evolving experimental *Drosophila melanogaster* populations. *Mol Biol*  
408 *Evol* 32(2):495-509.
- 409 Garland M, Rose MR. 2009. *Experimental evolution: concepts, methods, and applications of*  
410 *selection experiments*. Berkeley, CA: University of California Press.
- 411 Hill WG, Robertson A. 1966. The effect of linkage on limits to artificial selection. *Genet*  
412 *Res* 8(3):269–294.
- 413 Huang Y, Wright SI, Agrawal AF. 2014. Genome-wide patterns of genetic variation within  
414 and among alternative selective regimes. *PLoS Genet* 10(8):e1004527.
- 415 Ignatiadis N, Klaus B, Zaugg J, Huber W. 2016. Data-driven hypothesis weighting increases  
416 detection power in genome-scale multiple testing. *Nat Methods* 13(7):577-580.
- 417 Kawecki TJ, Lenski RE, Ebert D, Hollis B, Olivieri I, Whitlock MC. 2012. Experimental  
418 Evolution. *Trends Ecol Evol* 27(10):547-560.
- 419 Kofler R, Schlötterer C. 2013. A guide for the design of evolve and resequencing studies. *Mol*  
420 *Biol Evol* 31(2):474-483.

- 421 Lenormand T, Chevin LM, Bataillon T. 2016. Parallel evolution: what does it (not) tell us and  
422 why is it (still) interesting? In: Ramsey G, Pence CH, editors. *Chance in Evolution*. Chicago,  
423 USA: Chicago University Press. p.196.
- 424 Lenski RE. 2017. Experimental evolution and the dynamics of adaptation and genome  
425 evolution in microbial populations. *ISME J* 11(10):2181-2194.
- 426 Long A, Liti G, Luptak A, Tenaillon O. 2015. Elucidating the molecular architecture of  
427 adaptation via evolve and resequence experiments. *Nature Rev Genet* 16(10):567-582.
- 428 Michalak P, Kang L, Scho MF, Garner H, Loeschcke V. 2019. Genomic signatures of  
429 experimental adaptive radiation in *Drosophila*. *Mol Ecol* 28(3):600-614.
- 430 Nouhaud P, Tobler R, Nolte V, Schlötterer C. 2016. Ancestral population reconstitution from  
431 isofemale lines as a tool for experimental evolution. *Ecol Evol* 6(20):7169-7175.
432. Nuzhdin SV, Turner TL. 2013. Promises and limitations of hitchhiking mapping. *Curr Opin*  
433 *Genet Dev* 23(6):694–699.
434. Orozco-terWengel P, Kapun M, Nolte V, Kofler R, Flatt T, Schlötterer C. 2012. Adaptation of  
435 *Drosophila* to a novel laboratory environment reveals temporally heterogenous trajectories of  
436 selected alleles. *Mol Ecol* 21(20):4931-4941.
- 437 Papkou A, Guzella T, Yang W, Koepper S, Pees B, Schalkowski R, Barg MC, Rosenstiel PC,  
438 Teotónio H, Schulenburg H. 2019. The genomic basis of Red Queen dynamics during rapid  
439 reciprocal host–pathogen coevolution. *PNAS* 116(3):923-928.
- 440 Phillips MA, Rutledge GA, Kezos JN, Greenspan ZS, Talbott A, Matty S, Arain H, Mueller L,  
441 Rose MR, Shahrestani P. 2018. Effects of evolutionary history on genome wide phenotypic  
442 convergence in *Drosophila* populations. *BMC Genomics* 116(1):743.
- 443 Plucain J, Suau A, Cruveiller S, Médigue C, Schneider D, Le Gac M. 2016. Contrasting the  
444 effects of historical contingency on phenotypic and genomic trajectories during a two-step  
445 evolution experiment with bacteria. *BMC Evol Biol* 16(1):86.
- 446 Porter ML, Crandall KA. 2003. Lost along the way: the significance of evolution in reverse.  
447 *Trends Ecol Evol* 18(10):541-547.
- 448 Remigi P, Masson-Boivin C, Rocha EPC. 2019. Experimental evolution as a tool to investigate  
449 natural processes and molecular functions. *Trends Microbiol*.
- 450 Schlötterer C, Kofler R, Versace E, Tobler R, Franssen S. 2015. Combining experimental  
451 evolution with next-generation sequencing: a powerful tool to study adaptation from standing  
452 genetic variation. *Heredity* 114(5):431-440.
- 453 Schlötterer C, Tobler R, Kofler R, Nolte V. 2014. Sequencing pools of individuals - mining  
454 genome-wide polymorphism data without big funding. *Nat Rev Genet* 15(11):749-763.

- 455 Schou MF, Kristensen TN, Kellermann V, Schlötterer C, Loeschcke C. 2014. A *Drosophila*  
456 laboratory evolution experiment points to low evolutionary potential under increased  
457 temperatures likely to be experienced in the future. *J Evol Biol* 27(9):1859-1868.
- 458 Seabra SG, Fragata I, Antunes MA, Faria GS, Santos MA, Sousa VC, Simões P, Matos M.  
459 2017. Different genomic changes underlie adaptive evolution in populations of contrasting  
460 history. *MBE* 35(3):549-563.
- 461 Simões P, Fragata I, Santos J, Santos MA, Santos M, Rose MR, Matos M, unpublished data,  
462 <https://www.biorxiv.org/content/10.1101/579524v2>, last accessed June 26, 2019. How  
463 phenotypic convergence arises in experimental evolution.
- 464 Spitzer K, Pelizzola M, Futschik A, unpublished data, <https://arxiv.org/abs/1902.08127>, last  
465 accessed June 26, 2019. Modifying the Chi-square and the CMH test for population genetic  
466 inference: adapting to over-dispersion.
- 467 Teotónio H, Chelo IM, Bradić M, Rose MR, Long AD. 2009. Experimental evolution reveals  
468 natural selection on standing genetic variation. *Nat Genet* 41(2):251-257.
- 469 Teotónio H, Rose MR. 2001. Perspectives: reverse evolution. *Evolution* 55(4):653-660.
- 470 Tobler R, Franssen SU, Kofler R, Orozco-terWengel P, Nolte V, Hermisson J, Schlötterer C.  
471 2014. Massive habitat-specific genomic response in *D. melanogaster* populations during  
472 experimental evolution in hot and cold environments. *Mol Biol Evol* 31(2):364-375.
- 473 Turner T, Andrew S, Fields T, Rice WR, Tarone AM. 2011. Population-Based Resequencing  
474 of Experimentally Evolved Populations Reveals the Genetic Basis of Body Size Variation in  
475 *Drosophila melanogaster*. *PLoS Genet* 7(3):e1001336.
- 476 Turner T, Miller P. 2012. Investigating Natural Variation in *Drosophila* Courtship Song by the  
477 Evolve and Resequence Approach. *Genetics* 191(2):633-642.
